# Supplementary material for: A glutamate anion boosted zinc anode for deep cycling aqueous zinc ion batteries
Source: Royal Society of Chemistry journal article supplement (doi:10.1039/d2ta06975j), 2022-01-01
Supplement: d2ta06975j1.pdf [file d2ta06975j1.pdf]

Electronic Supplementary Material (ESI) for Journal of Materials Chemistry A.  
This journal is © The Royal Society of Chemistry 2022

## **Glutamate Anion Boosted Zinc for Deep Cycling Aqueous Zinc Ion Batteries**

Yu Liu,<sup>a, #</sup> Junhui Wang,<sup>b, #</sup> Jianguo Sun,<sup>b, #</sup> Fangyu Xiong,<sup>a</sup> Qin Liu,<sup>a</sup> Yongkang An,<sup>a</sup> Lei Shen,<sup>c</sup> John Wang,<sup>b, e</sup> Qinyou An,<sup>a, d, \*</sup> Liqiang Mai<sup>a, d, \*</sup>

<sup>a</sup> State Key Laboratory of Advanced Technology for Materials Synthesis and Processing, Wuhan University of Technology, Hubei, Wuhan 430070, China.

<sup>b</sup> Department of Materials Science and Engineering, National University of Singapore, Singapore, 117574, Singapore.

<sup>c</sup> Department of Mechanical Engineering, National University of Singapore, Singapore, 117575, Singapore.

<sup>d</sup> Foshan Xianhu Laboratory of the Advanced Energy Science and Technology Guangdong Laboratory, Xianhu Hydrogen Valley, Foshan 528200, China.

<sup>e</sup> Institute of Materials Research and Engineering, A\*Star, Singapore, 138634, Singapore.

# Authors contribute equally to this work.

\*Corresponding authors. E-mail: anqinyou86@whut.edu.cn (Q. An), mlq518@whut.edu.cn (L. Mai)

The authors declare no competing financial interest.

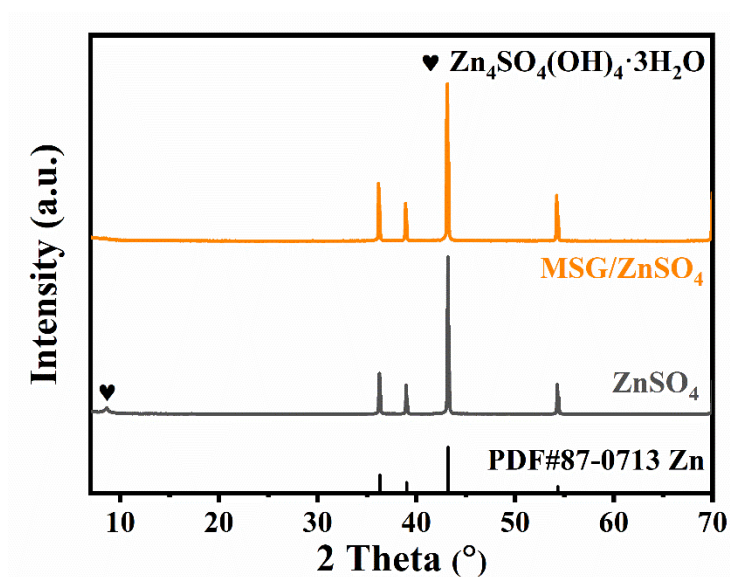

**Figure S1.** The XRD patterns of the Zn soaked in ZnSO<sub>4</sub> and MSG/ZnSO<sub>4</sub> for 5 days.

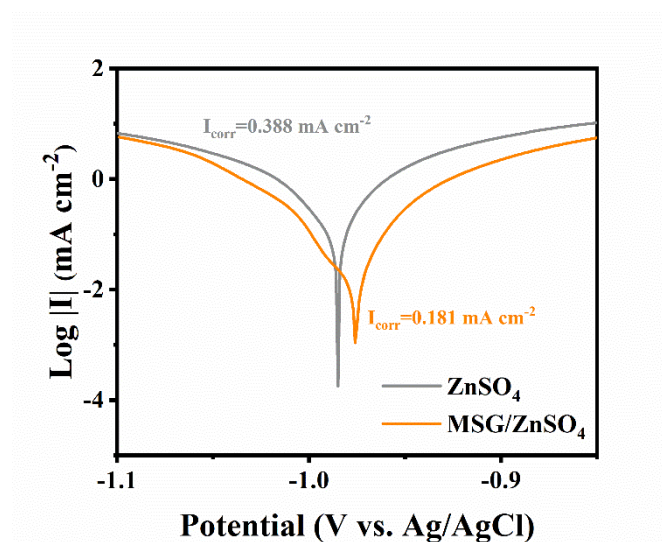

**Figure S2.** The Tafel plots of Zn in ZnSO<sub>4</sub> and MSG/ZnSO<sub>4</sub> electrolyte at a scan rate of 5 mV s<sup>-1</sup> using three-electrode system.

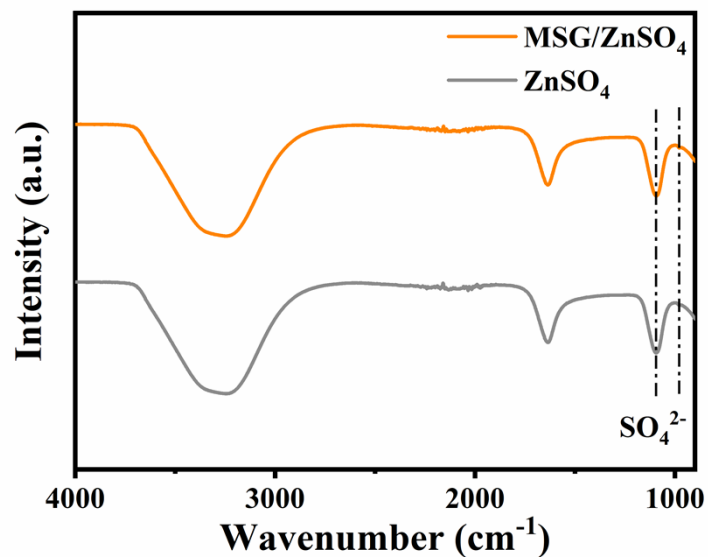

Figure S3. The ATR-FTIR of MSG/ZnSO<sub>4</sub> and ZnSO<sub>4</sub> electrolyte.

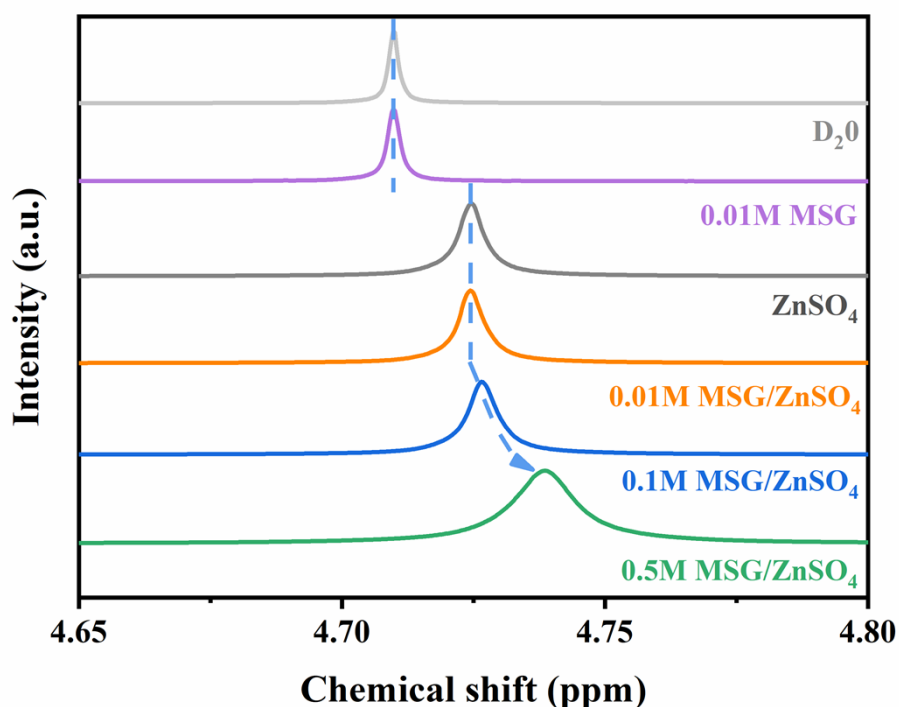

Figure S4. <sup>2</sup>H NMR spectra of D<sub>2</sub>O from MSG (0.01M), ZnSO<sub>4</sub>, x M MSG/ZnSO<sub>4</sub> (x is denoted as the concentration of MSG).

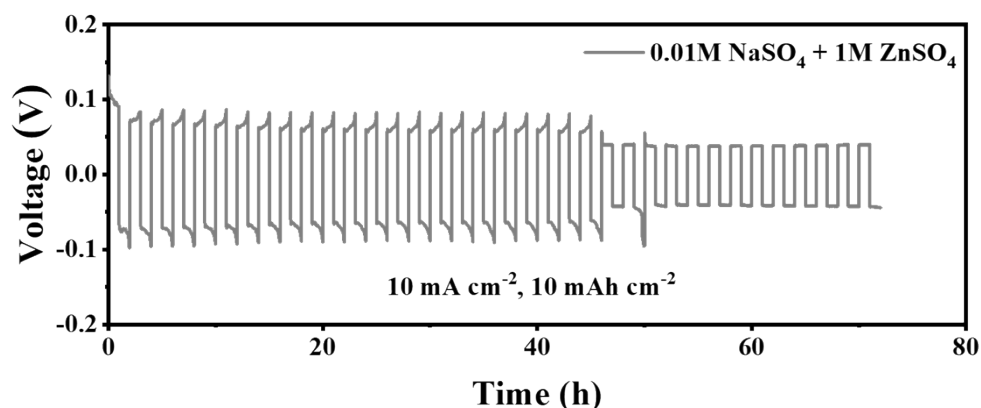

**Figure S5.** The electrochemical performance of Zn symmetric cell using 0.01M NaSO<sub>4</sub> + ZnSO<sub>4</sub> electrolyte.

Compared with the pure ZnSO<sub>4</sub> electrolyte, the cycle life of the symmetric battery using 0.01M NaSO<sub>4</sub> + ZnSO<sub>4</sub> electrolyte is not significantly improved, indicating that the improvement of the cycling stability of the symmetric battery using MSG/ ZnSO<sub>4</sub> is due to the introduction of Glu anions.

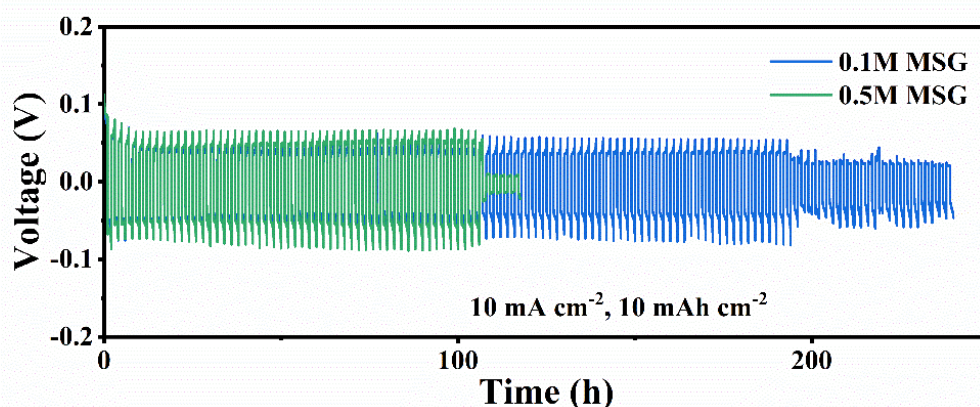

**Figure S6.** The electrochemical performance of Zn symmetric cell using MSG/ ZnSO<sub>4</sub> electrolyte with different concentrations of MSG.

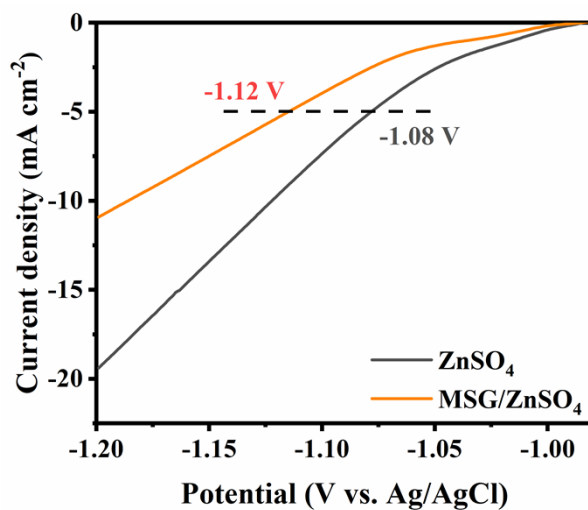

**Figure S7.** Comparison of HER performance under ZnSO<sub>4</sub> and MSG/ZnSO<sub>4</sub> electrolyte systems.

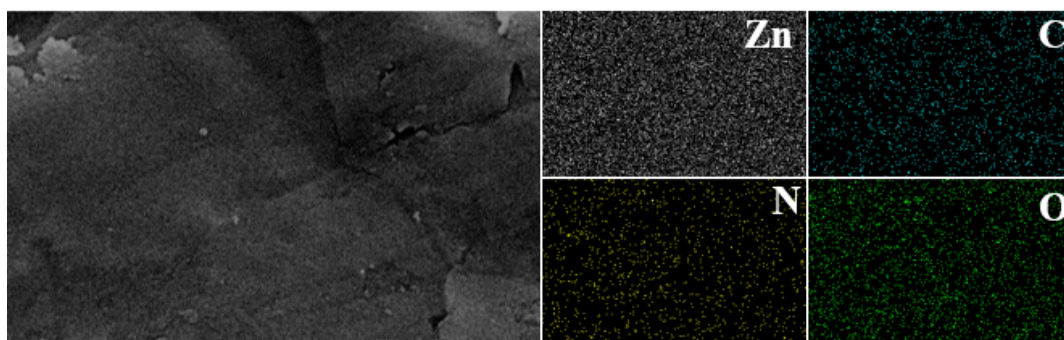

**Figure S8.** The EDS Mapping of Zn anode tested in MSG/ZnSO<sub>4</sub> electrolyte for 50 cycles in a current density of 1mA cm<sup>-2</sup> with an area capacity of 1mAh cm<sup>-2</sup>.

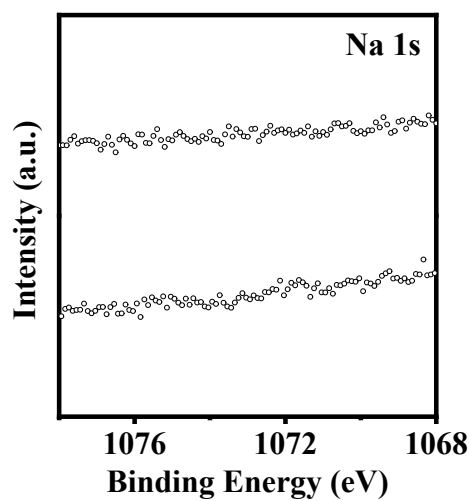

**Figure S9.** The XPS depth profile for Na 1s of Zn anode surface using in MSG/ZnSO<sub>4</sub> electrolyte for 50 cycles.

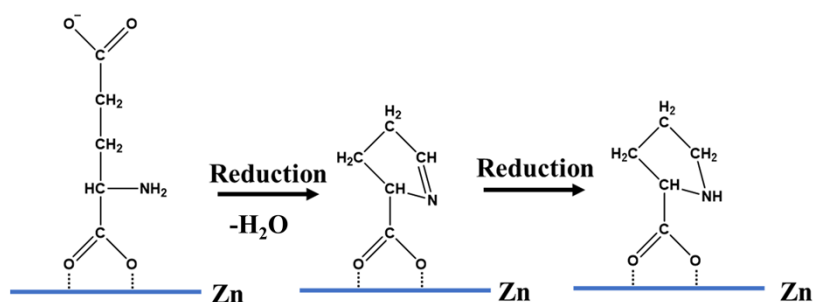

**Figure S10.** The reduction reactions process of Glu<sup>-</sup> on Zn metal surface.

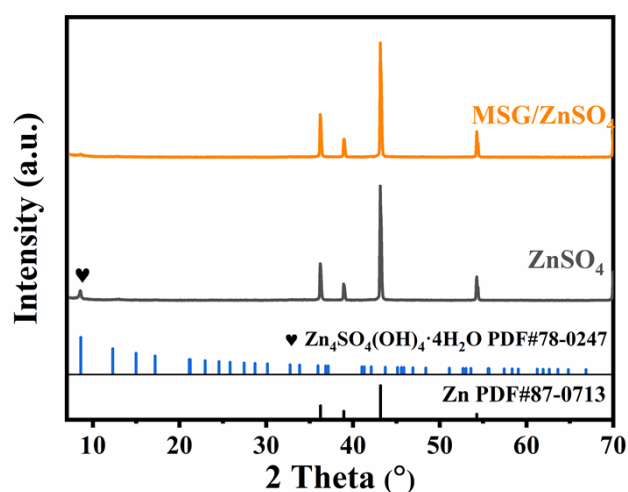

**Figure S11.** The XRD spectra of Zn anode tested in ZnSO<sub>4</sub> and MSG/ZnSO<sub>4</sub> electrolyte for 50 cycles in a current density of 1 mA cm<sup>-2</sup> with an area capacity of 1 mAh cm<sup>-2</sup>.

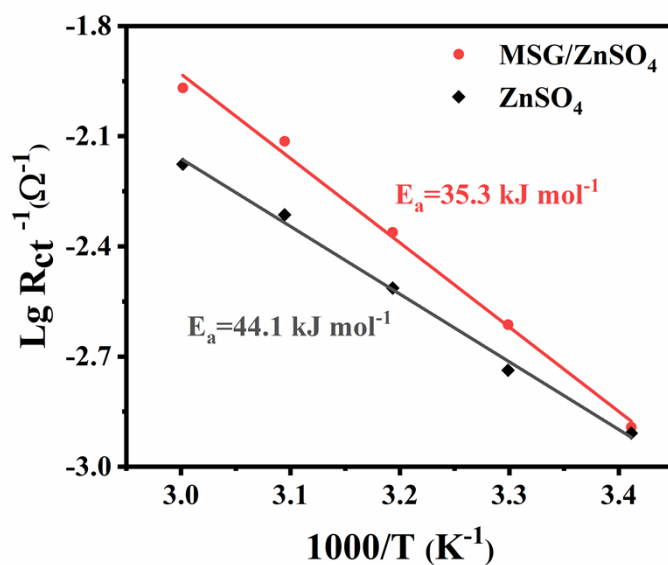

**Figure S12.** Comparison of Arrhenius curves and activation energies of Zn//Zn symmetric cells using ZnSO<sub>4</sub> and MSG/ ZnSO<sub>4</sub> electrolyte after 20 cycles.

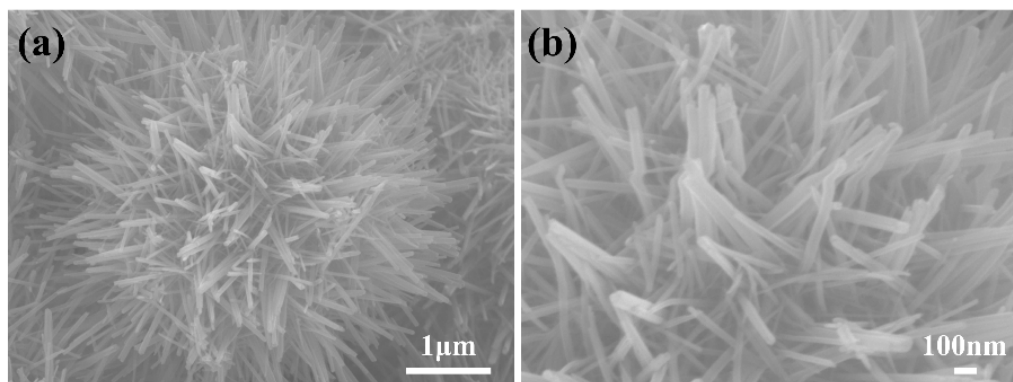

**Figure S13.** SEM images of the MnO<sub>2</sub>.

The morphology of the MnO<sub>2</sub> is sea urchin-like microspheres self-assembled from strip-shaped nanosheets.

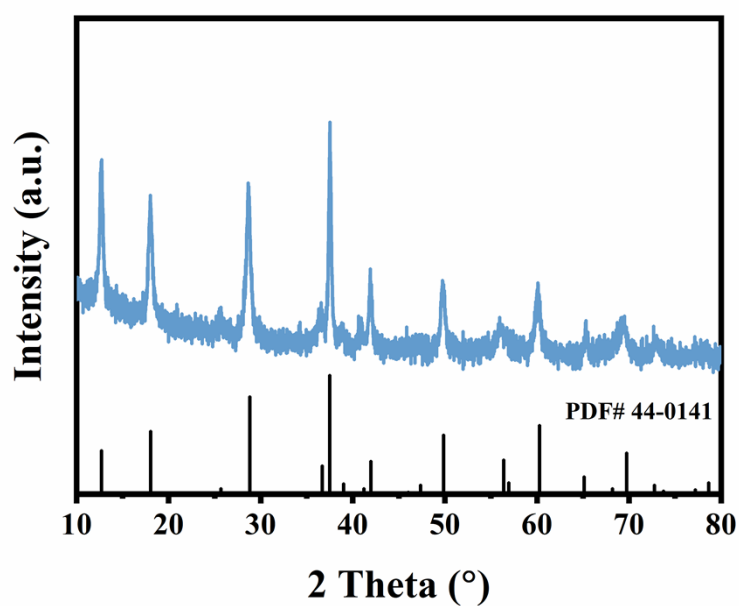

**Figure S14.** XRD pattern of the MnO<sub>2</sub>.

The diffraction peaks of the MnO<sub>2</sub>/CNT composite are well-indexed to the characteristic peaks of α-MnO<sub>2</sub> (PDF# 44-0141).



**Table S1.** Summary of the previous published CPC result in aqueous Zn ion battery.

| Salt and additive                                                                    | solvent                         | Current density (mA cm <sup>-2</sup> ) | Plated capacity (mAh cm <sup>-2</sup> ) | Cycle | Time(h) | Cumulative plated capacity (Ah cm <sup>-2</sup> ) | Ref   |    |
|--------------------------------------------------------------------------------------|---------------------------------|----------------------------------------|-----------------------------------------|-------|---------|---------------------------------------------------|-------|----|
| 1M ZnOTF + 1mg ml <sup>-1</sup> SDBS                                                 | H <sub>2</sub> O                | 0.5                                    | 0.25                                    | 1500  | 1500    | 0.375                                             | 1     |    |
| 1M ZnSO <sub>4</sub> + 0.5 M NaSO <sub>4</sub>                                       |                                 | 0.2                                    | 0.2                                     | 150   | 300     | 0.075                                             | 2     |    |
| 2M ZnSO <sub>4</sub> + 0.05 M TBA <sub>2</sub> SO <sub>4</sub>                       |                                 | 2                                      | 2                                       | 150   | 300     | 0.3                                               | 3     |    |
|                                                                                      |                                 | 5                                      | 2                                       | 570   | 456     | 1.14                                              |       |    |
|                                                                                      |                                 | 10                                     | 2                                       | 1000  | 400     | 2                                                 |       |    |
| 1M ZnSO <sub>4</sub> + 0.1 M TSC                                                     |                                 | 5                                      | 5                                       | 80    | 160     | 0.4                                               | 4     |    |
|                                                                                      |                                 | 1.25                                   | 1.25                                    | 840   | 420     | 1.05                                              |       |    |
| 1M ZnOTF + 0.05Mm DA                                                                 |                                 | 1                                      | 1                                       | 550   | 1100    | 0.55                                              | 5     |    |
|                                                                                      |                                 | 10                                     | 10                                      | 100   | 200     | 1                                                 |       |    |
|                                                                                      |                                 | 30                                     | 30                                      | 39    | 78      | 1.17                                              |       |    |
| 1M ZnOTF + 0.025Mm Zn(H <sub>2</sub> PO <sub>4</sub> ) <sub>2</sub>                  |                                 | 1                                      | 1                                       | 600   | 1200    | 0.6                                               | 6     |    |
|                                                                                      |                                 | 1                                      | 5                                       | 80    | 800     | 0.4                                               |       |    |
|                                                                                      |                                 | 5                                      | 1                                       | 550   | 220     | 0.55                                              |       |    |
|                                                                                      |                                 | 5                                      | 5                                       | 32    | 64      | 0.16                                              |       |    |
| 2M ZnSO <sub>4</sub> + 0.2 M Co <sub>2</sub> SO <sub>4</sub>                         |                                 | 0.2                                    | 0.2                                     | 140   | 280     | 0.28                                              | 7     |    |
| 1M ZnSO <sub>4</sub> + 0.01 M Glucose                                                |                                 | 1                                      | 1                                       | 1000  | 2000    | 1                                                 | 8     |    |
|                                                                                      |                                 | 5                                      | 5                                       | 135   | 270     | 0.675                                             |       |    |
| 2M ZnSO <sub>4</sub>                                                                 |                                 | DMSO/H <sub>2</sub> O =1/4(v/v)        | 1                                       | 1     | 1075    | 2150                                              | 1.075 | 9  |
|                                                                                      |                                 |                                        | 3                                       | 3     | 100     | 200                                               | 0.3   |    |
| 1.3 M ZnCl <sub>2</sub>                                                              |                                 | DMSO/H <sub>2</sub> O =1/4.3 (v/v)     | 0.5                                     | 0.5   | 500     | 1000                                              | 0.25  | 10 |
| 1.0M ZnSO <sub>4</sub> +1g L <sup>-1</sup> PAM                                       |                                 | 1                                      | 1                                       | 90    | 180     | 0.09                                              | 11    |    |
|                                                                                      |                                 | 2                                      | 4                                       | 70    | 280     | 0.28                                              |       |    |
|                                                                                      |                                 | 20                                     | 1                                       | 1100  | 110     | 1.1                                               |       |    |
| 1.0M ZnSO <sub>4</sub> +0.12wt% GO                                                   | 1                               | 0.5                                    | 650                                     | 650   | 0.325   | 12                                                |       |    |
|                                                                                      | 5                               | 2.5                                    | 400                                     | 400   | 1       |                                                   |       |    |
|                                                                                      | 10                              | 5                                      | 140                                     | 140   | 0.6     |                                                   |       |    |
| 2M ZnSO <sub>4</sub> +0.05 KPF <sub>6</sub>                                          | 2                               | 4                                      | 300                                     | 1200  | 1.2     | 13                                                |       |    |
|                                                                                      | 5                               | 10                                     | 202                                     | 808   | 2.02    |                                                   |       |    |
|                                                                                      | 10                              | 20                                     | 62                                      | 250   | 1.24    |                                                   |       |    |
| 3 M Zn(CF <sub>3</sub> SO <sub>3</sub> ) <sub>2</sub> +2 vol% Et <sub>2</sub> O      | H <sub>2</sub> O                | 0.2                                    | 0.2                                     | 125   | 250     | 0.025                                             | 14    |    |
| 1M ZnSO <sub>4</sub> +3M urea                                                        | H <sub>2</sub> O                | 1                                      | 1                                       | 350   | 700     | 0.35                                              | 15    |    |
| 1M ZnSO <sub>4</sub> +0.075M Na <sub>4</sub> EDTA                                    |                                 | 2                                      | 2                                       | 225   | 450     | 0.45                                              | 16    |    |
|                                                                                      |                                 | 5                                      | 2                                       | 2500  | 2000    | 5                                                 |       |    |
| 2M ZnSO <sub>4</sub> +0.4g L <sup>-1</sup> GQDs                                      | 0.8                             | 0.2                                    | 4400                                    | 2200  | 0.88    | 17                                                |       |    |
|                                                                                      | 2                               | 0.2                                    | 3600                                    | 1800  | 0.72    |                                                   |       |    |
| 1M ZnSO <sub>4</sub> +0.3g L <sup>-1</sup> veratraldehyde                            | 1                               | 1                                      | 1500                                    | 3000  | 1.5     | 18                                                |       |    |
|                                                                                      | 2                               | 2                                      | 450                                     | 900   | 0.9     |                                                   |       |    |
|                                                                                      | 5                               | 5                                      | 400                                     | 800   | 2       |                                                   |       |    |
| 2M ZnSO <sub>4</sub>                                                                 | NMP/H <sub>2</sub> O =1/20(v/v) | 1                                      | 1                                       | 270   | 540     | 0.27                                              | 19    |    |
| 2M ZnSO <sub>4</sub> + 0.5g L <sup>-1</sup> SAC                                      | H <sub>2</sub> O                | 10                                     | 10                                      | 275   | 550     | 2.75                                              | 20    |    |
|                                                                                      |                                 | 40                                     | 10                                      | 220   | 110     | 2.2                                               |       |    |
| 4 M Zn(BF <sub>4</sub> ) <sub>2</sub> + 2 mM Al(OTf) <sub>3</sub>                    | DOL                             | 0.1                                    | 1                                       | 900   | 1800    | 0.9                                               | 21    |    |
|                                                                                      |                                 | 1                                      | 0.5                                     | 900   | 1800    | 0.45                                              |       |    |
| 4 M Zn(CF <sub>3</sub> SO <sub>3</sub> ) <sub>2</sub> + 0.5 M Me <sub>3</sub> EtNOTF | H <sub>2</sub> O                | 0.5                                    | 0.25                                    | 6000  | 6000    | 1.5                                               | 22    |    |
| 4 M Zn(TFSI) <sub>2</sub> +                                                          |                                 | 0.5                                    | 0.5                                     | 3000  | 6000    | 1.5                                               | 23    |    |

|                                                        |                  |     |     |      |      |        |      |              |
|--------------------------------------------------------|------------------|-----|-----|------|------|--------|------|--------------|
| 4 M P444 <sub>(201)</sub> <sup>-</sup><br>TFSI         |                  | 1   | 1   | 400  | 800  | 0.4    |      |              |
|                                                        |                  | 2.5 | 2.5 | 125  | 250  | 0.3125 |      |              |
| 2 M ZnSO <sub>4</sub> + 0.08<br>M ZnF <sub>2</sub>     |                  | 1   | 1   | 300  | 600  | 0.3    | 24   |              |
|                                                        |                  | 0.5 | 0.5 | 1600 | 3200 | 0.8    |      |              |
| 2 M ZnSO <sub>4</sub> + 8<br>mg mL <sup>-1</sup> PASP  |                  | 20  | 1   | 2000 | 200  | 2      | 25   |              |
|                                                        |                  | 1   | 1   | 1750 | 3500 | 1.75   |      |              |
| 2 M ZnSO <sub>4</sub> + 0.05<br>M H <sub>4</sub> OAc   |                  | 10  | 1   | 5000 | 1000 | 5      | 26   |              |
|                                                        |                  | 1   | 1   | 250  | 500  | 0.25   | 27   |              |
| 1 M ZnSO <sub>4</sub> + 4 M<br>EMImCl                  |                  | 1   | 2   | 250  | 1000 | 0.25   |      |              |
|                                                        |                  | 2   | 2   | 450  | 900  | 0.9    | 28   |              |
| 2 M ZnSO <sub>4</sub> + 0.5<br>g L <sup>-1</sup> TMBAC |                  | 5   | 5   | 300  | 600  | 1.5    |      |              |
|                                                        |                  | 10  | 5   | 500  | 500  | 2.5    |      |              |
|                                                        |                  | 1   | 1   | 2000 | 4000 | 2      |      |              |
| 1 M ZnSO <sub>4</sub> + 0.01<br>M MSG                  | H <sub>2</sub> O |     | 10  | 10   | 260  | 520    | 2.6  | This<br>work |
|                                                        |                  |     | 20  | 20   | 88   | 176    | 1.76 |              |

## References

- 1 J. Hao, J. Long, B. Li, X. Li, S. Zhang, F. Yang, X. Zeng, Z. Yang, W. K. Pang and Z. Guo, *Adv. Funct. Mater.*, 2019, **29**, 1903605.
- 2 Y. Xu, J. Zhu, J. Feng, Y. Wang, X. Wu, P. Ma, X. Zhang, G. Wang and X. Yan, *Energy Storage Mater.*, 2021, **38**, 299-308.
- 3 A. Bayaguud, X. Luo, Y. Fu and C. Zhu, *ACS Energy Lett.*, 2020, **5**, 3012-3020.
- 4 N. Wang, S. Zhai, Y. Ma, X. Tan, K. Jiang, W. Zhong, W. Zhang, N. Chen, W. Chen, S. Li, G. Han and Z. Li, *Energy Storage Mater.*, 2021, **43**, 585-594.
- 5 X. Zeng, K. Xie, S. Liu, S. Zhang, J. Hao, J. Liu, W. K. Pang, J. Liu, P. Rao, Q. Wang, J. Mao and Z. Guo, *Energy Environ. Sci.*, 2021, **14**, 5947-5957.
- 6 X. Zeng, J. Mao, J. Hao, J. Liu, S. Liu, Z. Wang, Y. Wang, S. Zhang, T. Zheng, J. Liu, P. Rao and Z. Guo, *Adv. Mater.*, 2021, **33**, e2007416.
- 7 L. Ma, S. Chen, H. Li, Z. Ruan, Z. Tang, Z. Liu, Z. Wang, Y. Huang, Z. Pei, J. A. Zapien and C. Zhi, *Energy Environ. Sci.*, 2018, **11**, 2521-2530.
- 8 P. Sun, L. Ma, W. Zhou, M. Qiu, Z. Wang, D. Chao and W. Mai, *Angew. Chem. Int. Ed.*, 2021, **60**, 18247-18255.
- 9 D. Feng, F. Cao, L. Hou, T. Li, Y. Jiao and P. Wu, *Small*, 2021, **17**, e2103195.
- 10 L. Cao, D. Li, E. Hu, J. Xu, T. Deng, L. Ma, Y. Wang, X. Q. Yang and C. Wang, *J. Am. Chem. Soc.*, 2020, **142**, 21404-21409.
- 11 Q. Zhang, J. Luan, L. Fu, S. Wu, Y. Tang, X. Ji and H. Wang, *Angew. Chem. Int. Ed.*, 2019, **58**, 15841-15847.
- 12 J. Abdulla, J. Cao, D. Zhang, X. Zhang, C. Sriprachuabwong, S. Kheawhom, P. Wangyao and J. Qin, *ACS Appl. Energy Mater.*, 2021, **4**, 4602-4609.
- 13 Y. Chu, S. Zhang, S. Wu, Z. Hu, G. Cui and J. Luo, *Energy Environ. Sci.*, 2021, **14**, 3609-3620.
- 14 W. Xu, K. Zhao, W. Huo, Y. Wang, G. Yao, X. Gu, H. Cheng, L. Mai, C. Hu and X. Wang, *Nano Energy*, 2019, **62**, 275-281.
- 15 Z. Hou, M. Dong, Y. Xiong, X. Zhang, H. Ao, M. Liu, Y. Zhu and Y. Qian, *Small*, 2020, **16**, e2001228.
- 16 S. J. Zhang, J. Hao, D. Luo, P. F. Zhang, B. Zhang, K. Davey, Z. Lin and S. Z. Qiao, *Adv. Energy Mater.*, 2021, **11**, 2102010.
- 17 H. Zhang, R. Guo, S. Li, C. Liu, H. Li, G. Zou, J. Hu, H. Hou and X. Ji, *Nano Energy*, 2022, **92**, 106752.
- 18 M. Qiu, L. Ma, P. Sun, Z. Wang, G. Cui and W. Mai, *Nano-Micro Lett.*, 2021, **14**, 31.
- 19 T. C. Li, Y. Lim, X. L. Li, S. Luo, C. Lin, D. Fang, S. Xia, Y. Wang and H. Y. Yang, *Adv. Energy Mater.*, 2022, DOI: 10.1002/aenm.202103231, 2103231.
- 20 C. Huang, X. Zhao, S. Liu, Y. Hao, Q. Tang, A. Hu, Z. Liu and X. Chen, *Adv. Mater.*, 2021, **33**, e2100445.
- 21 L. Ma, S. Chen, X. Li, A. Chen, B. Dong and C. Zhi, *Angew. Chem. Int. Ed.*, 2020, **59**, 23836-23844.
- 22 L. Cao, D. Li, T. Pollard, T. Deng, B. Zhang, C. Yang, L. Chen, J. Vatamanu, E. Hu, M. J. Hourwitz, L. Ma, M. Ding, Q. Li, S. Hou, K. Gaskell, J. T. Fourkas, X. Q. Yang, K. Xu, O. Borodin and C. Wang, *Nat. Nanotechnol.*, 2021, **16**, 902-910.
- 23 L. Ma, T. P. Pollard, Y. Zhang, M. A. Schroeder, M. S. Ding, A. V. Cresce, R. Sun, D. R. Baker, B. A. Helms, E. J. Maginn, C. Wang, O. Borodin and K. Xu, *Angew. Chem. Int. Ed.*, 2021, **60**, 12438-12445.
- 24 Y. An, Y. Tian, K. Zhang, Y. Liu, C. Liu, S. Xiong, J. Feng and Y. Qian, *Adv. Funct. Mater.*, 2021, **31**, 2101886.
- 25 T. Zhou, Y. Mu, L. Chen, D. Li, W. Liu, C. Yang, S. Zhang, Q. Wang, P. Jiang, G. Ge and H. Zhou, *Energy Storage Mater.*, 2022, **45**, 777-785.

- 26 D. Han, Z. Wang, H. Lu, H. Li, C. Cui, Z. Zhang, R. Sun, C. Geng, Q. Liang, X. Guo, Y. Mo, X. Zhi, F. Kang, Z. Weng and Q. H. Yang, *Adv. Energy Mater.*, 2022, **12**, 2102982.
- 27 Q. Zhang, Y. Ma, Y. Lu, X. Zhou, L. Lin, L. Li, Z. Yan, Q. Zhao, K. Zhang and J. Chen, *Angew. Chem. Int. Ed.*, 2021, **60**, 23357-23364.
- 28 K. Guan, L. Tao, R. Yang, H. Zhang, N. Wang, H. Wan, J. Cui, J. Zhang, H. Wang and H. Wang, *Adv. Energy Mater.*, 2022, **12**, 2103557.
